# Supplementary material for: A member of the maize isopentenyl transferase gene family, Zea mays isopentenyl transferase 2 (ZmIPT2), encodes a cytokinin biosynthetic enzyme expressed during kernel development
Source: Springer Nature journal article supplement (doi:10.1007/s11103-008-9312-x), 2008-03-03
Supplement: MOESM1 [file 11103_2008_9312_MOESM1_ESM.xls]

## Sheet: Sheet1
Table 1S ZmIPT Genbank accession numbers and corresponding MAGI and AZM contigs
ZmIPT gene	Accession number	Corresponding genomic sequence (E-value≤e-172)
		MAGI	AZM
ZmIPT11	EU263125	MAGI4_156301	AZM4_23799
ZmIPT2	EU263126	MAGI4_43337	AZM4_33815
ZmIPT31,2		MAGI4_156301	AZM4_23799
ZmIPT4	EU263127	MAGI4_24143	AZM4_112229
ZmIPT5	EU263128	MAGI4_1408	AZM4_69553
		MAGI4_1409	AZM4_69555
		MAGI4_1410
ZmIPT6	EU263129	MAGI4_61248	AZM4_69552
			AZM4_69554
ZmIPT7	EU263130	MAGI4_28616	AZM4_24933
ZmIPT8	EU263131	MAGI4_21255	AZM4_113551
ZmIPT92		MAGI4_134609	AZM4_26391
1: ZmIPT1 was originaly identified from a proprietary EST, the genomic sequence was
subcloned from a proprietary BAC clones and was found to be identical to ZmIPT3
2: No significant ORFs could be detected in these genomic sequences
